# Supplementary material for: Cationic ether-free poly(bis-alkylimidazolium) ionene blend polybenzimidazole as anion exchange membranes
Source: Royal Society of Chemistry journal article supplement (doi:10.1039/d0py00932f), 2020-01-01
Supplement: d0py00932f1.pdf [file d0py00932f1.pdf]

## Supporting Information

### Cationic ether-free poly(bis-alkylimidazolium) ionenes blend polybenzimidazole as anion exchange membranes

Jianhao Dong<sup>a,1</sup>, Na Yu<sup>a,1</sup>, Xuefu Che<sup>a</sup>, Ruihong Liu<sup>a</sup>, David Aili<sup>b,\*</sup>, Jingshuai Yang<sup>a,\*</sup>

<sup>a</sup>Department of Chemistry, College of Sciences, Northeastern University, Shenyang 110819, China, \*Corresponding author (E-mail: yjs@mail.neu.edu.cn)

<sup>b</sup>Department of Energy Conversion and Storage, Technical University of Denmark, Elektrovej, Building 375, 2800 Lyngby, Denmark, \*Corresponding author (E-mail: larda@dtu.dk)

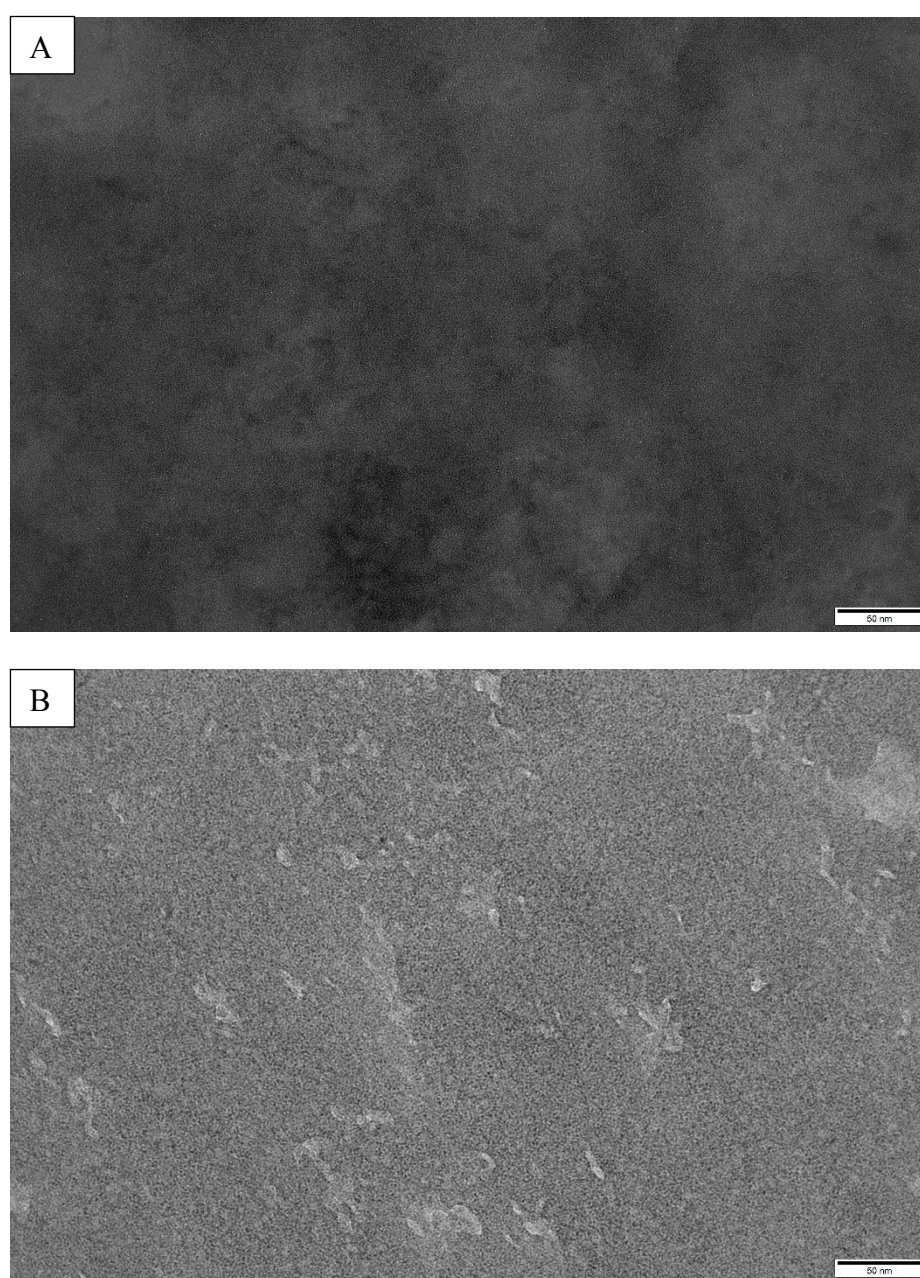

Figure S1 TME of PBulm-37%/PBI and PBnlm-95%/PBI membranes

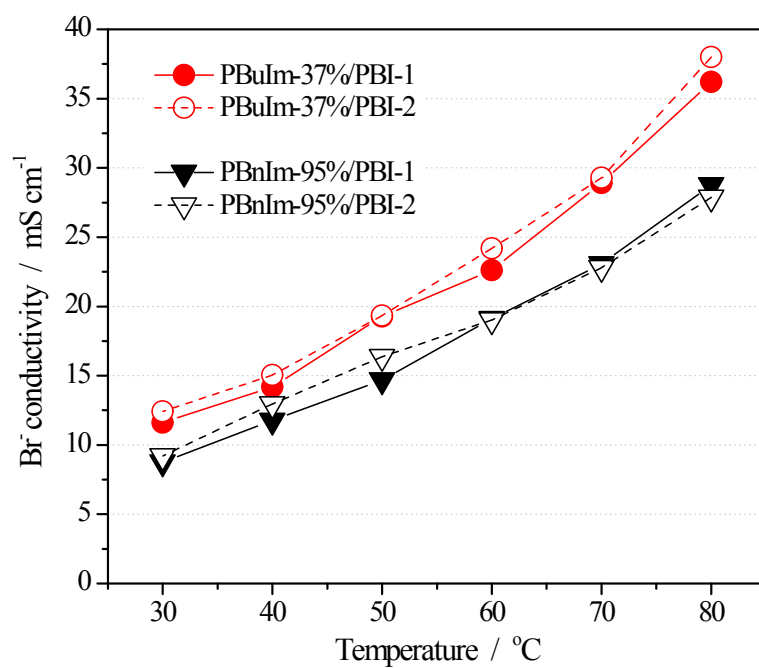

Figure S2 Conductivities of PBuIm-37%/PBI and PBnIm-95%/PBI membranes in Br<sup>-</sup> form as a function of temperature. (1) The membranes in Br<sup>-</sup> form prepared by solution-casting; (2) the membranes in Br<sup>-</sup> form prepared by exchanging the membranes in OH<sup>-</sup> form after conductivity measurement to bromide form

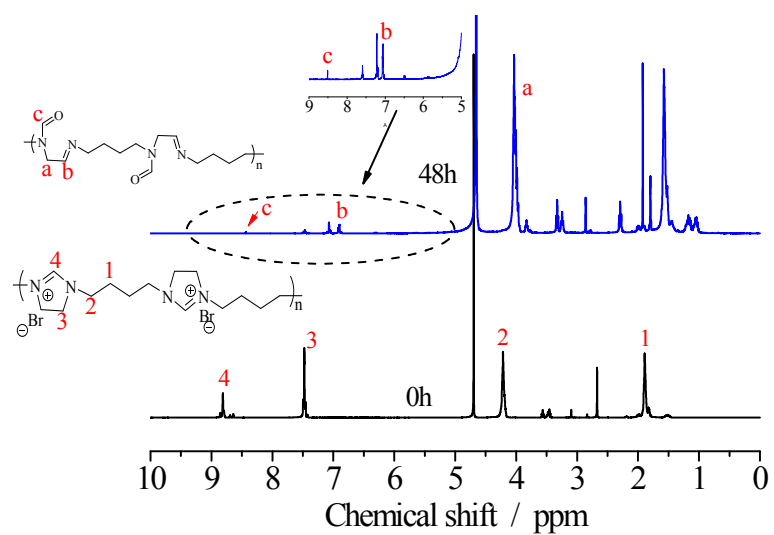

(a)

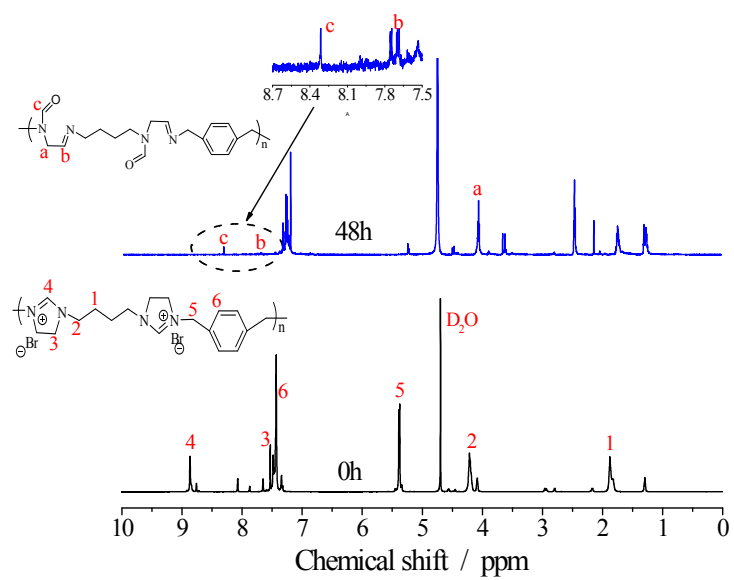

(b)

Fig. S3  $^1\text{H}$  NMR spectra of PBnlm (a) and PBulm (b) after soaking in  $1\text{ mol L}^{-1}$  NaOD/ $\text{D}_2\text{O}$  for 48 h.
